# Supplementary material
Source: publisher figshare collection journal article supplement (https://acs.figshare.com/ndownloader/files/11541974)
Supplement: Supplementary file 1 [file 11541974]

## Supporting information document

*Manuscript title:* Parametric investigations of the induced shear stress by a laser generated bubble

*Manuscript ID:* la-2018-012743

*Authors:* Phoevos Koukouviniis, George Strotos, Qingyun Zeng, Silvestre Roberto Gonzalez-Avila, Andreas Theodorakakos, Manolis Gavaises, Claus-Dieter Ohl

Number of pages (excluding cover page): 3

Number of figures: 2

Number of tables: 1

## Supporting information for:

### Parametric investigations of the induced shear stress by a laser generated bubble

*Phoevos Koukouvinis<sup>1,\*</sup>, George Strotos<sup>2</sup>, Qingyun Zeng<sup>3</sup>, Silvestre Roberto Gonzalez-Avila<sup>3</sup>, Andreas Theodorakakos<sup>4</sup>, Manolis Gavaises<sup>1</sup>, Claus-Dieter Ohl<sup>5</sup>*

1. City, University of London, Northampton Square, London EC1V 0HB, United Kingdom

2. Technological Educational Institute of Thessaly, Mechanical Engineering Department, 41110 Larissa, Greece

3. Division of Physics and Applied Physics, School of Physical and Mathematical Sciences, Nanyang Technological University, 21 Nanyang Link, Singapore 637371

4. Technological Educational Institute of Piraeus, Mechanical Engineering Department, Thivon 250, Egaleo 122 41, Greece

5. Institute of Experimental Physics, Soft Matter Department, Otto von Guericke University Magdeburg, Universitätsplatz 2, D-39106 Magdeburg

(\*) Corresponding author, email: foivos.koukouvinis.1@city.ac.uk

#### Supporting information 1: Tait Equation of state predictive capability

Table S1 demonstrates the predictive capability of Tait<sup>1</sup>, stiffened gas<sup>2</sup> and Redlich-Kwong-Peng-Robinson<sup>3</sup> (RK-PR) equations of state against the IAPWS steam/water tables<sup>4</sup>. All results are based on isentropic compression starting from saturated liquid at 20°C and pressure of 2339Pa according to IAPWS. As demonstrated in the table, Tait equation of state is superior in predicting compressed liquid states, with a minimum relative error of max. 0.06%. The RK-PR equation of state follows with a max. relative error in density predictions of ~2%. Finally, the stiffened gas equation of state has a serious relative error of up to ~46%. Note that the stiffened gas equation of state is well known to have serious deficiencies in accurately predicting heat capacity, speed of sound and liquid densities, see<sup>5</sup>.

Table S1. Comparison between predicted density and density errors for various pressure levels between IAPWS, Tait, stiffened gas and RK-PR equations of state.

| Pressure (bar) | Density IAPWS (kg/m <sup>3</sup> ) | Density Tait (kg/m <sup>3</sup> ) | Err. Tait (%) | Density Stiff gas (kg/m <sup>3</sup> ) | Err. stiff gas (%) | Density RK-PR (kg/m <sup>3</sup> ) | Err. RK-PR (%) |
|----------------|------------------------------------|-----------------------------------|---------------|----------------------------------------|--------------------|------------------------------------|----------------|
| 0.023          | 998.2                              | 998.2                             | 0.00          | 1391.4                                 | 39.4               | 1012.9                             | 1.48%          |
| 1.000          | 998.2                              | 998.2                             | 0.00          | 1391.6                                 | 39.4               | 1012.9                             | 1.48%          |
| 10.000         | 998.6                              | 998.6                             | 0.00          | 1392.7                                 | 39.5               | 1013.0                             | 1.44%          |
| 100.000        | 1002.7                             | 1002.6                            | 0.00          | 1404.6                                 | 40.1               | 1013.7                             | 1.10%          |
| 200.000        | 1007.1                             | 1007.0                            | 0.00          | 1417.8                                 | 40.8               | 1014.5                             | 0.74%          |
| 500.000        | 1019.7                             | 1019.4                            | 0.02          | 1456.8                                 | 42.9               | 1016.7                             | 0.29%          |
| 750.000        | 1029.6                             | 1029.1                            | 0.04          | 1488.8                                 | 44.6               | 1018.4                             | 1.08%          |
| 1000.000       | 1038.9                             | 1038.3                            | 0.06          | 1520.4                                 | 46.3               | 1020.0                             | 1.82%          |

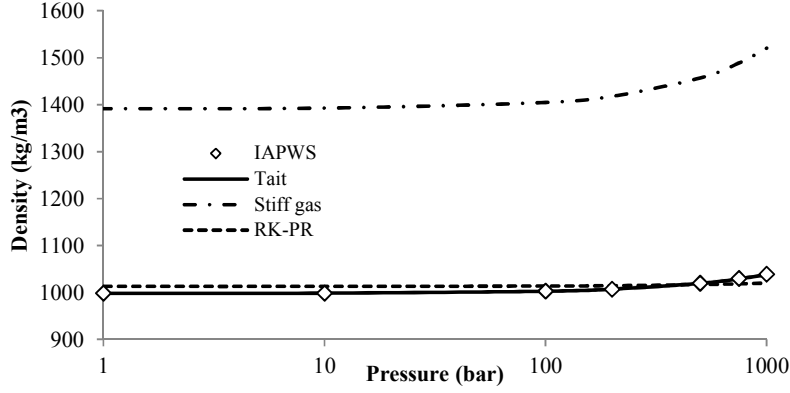

Figure S1. Tait<sup>44</sup>, stiffened gas<sup>48</sup> and RK-PR equation of state<sup>49</sup> predictions for water in comparison to IAPWS<sup>45</sup>.

The parameters used are:

- For Tait equation of state, the same as those described in the numerical model section
- For the stiffened gas equation of state, following Saurel et al.<sup>2</sup>:  $p_\infty = 10^9 \text{ Pa}$ ,  $c_v = 1816 \text{ J/kg.K}$ ,  $\gamma = 2.35$
- For the RK-PR equation of state: acentric factor,  $\omega = 0.3443$ , critical temperature  $T_c = 647.1 \text{ K}$ , critical pressure  $p_c = 22.064 \text{ MPa}$ , critical compressibility factor  $Z_c = 0.229446$ . These values are provided by NIST Refprop<sup>6</sup>.

## Supporting information 2: Mass conservation error

The following graph (Figure S2) shows the gas mass over time, throughout the simulation, to demonstrate the conservation of bubble gas. The deviation is defined as:

$$\text{err}(\%) = \frac{m(t) - m_{t=0}}{m_{t=0}} \cdot 100\%$$

As can be seen, the maximum deviation is less than 0.15%, which is considered adequate.

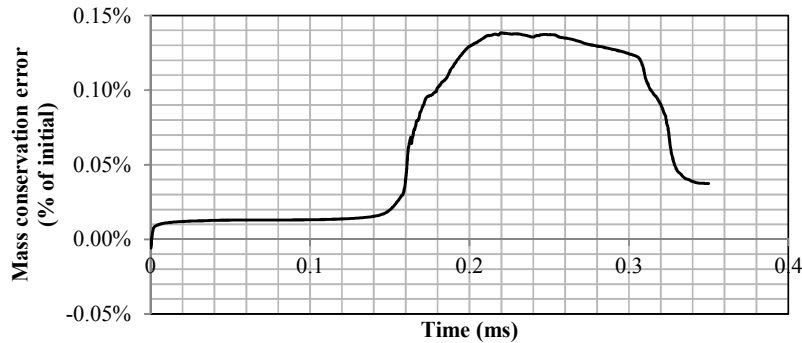

Figure S2. Gas mass conservation error in respect to time. Maximum error is less than 0.15%.

**References:**

- (1) Ivings, M. J.; Causon, D. M.; Toro, E. F. On Riemann solvers for compressible liquids *International Numerical Methods for Fluids* 1998, 28, 395.
- (2) Saurel, R.; Petitpas, F.; Abgrall, R. Modelling phase transition in metastable liquids: application to cavitating and flashing flows *Journal of Fluid Mechanics* 2008, 607, 313.
- (3) Kim, S.-K.; Choi, H.-S.; Kim, Y. Thermodynamic modeling based on a generalized cubic equation of state for kerosene/LOx rocket combustion *Combustion and Flame* 2012, 159, 1351.
- (4) Wagner, W.; Kretzschmar, H.-J. *International Steam Tables - Properties of Water and Steam based on the Industrial Formulation IAPWS-IF97*; 2nd ed.; Springer-Verlag Berlin Heidelberg, 2008.
- (5) Koop, A. H.; Numerical Simulation of Unsteady Three-Dimensional Sheet Cavitation. University of Twente, Enschede, 2008.
- (6) *NIST Standard Reference Database 23: Reference Fluid Thermodynamic and Transport Properties-REFPROP, Version 9.1*, Lemmon, E. W.; Huber, M. L.; McLinden, M. O. 2013
